# Supplementary material for: Postpartum breast involution reveals regression of secretory lobules mediated by tissue-remodeling
Source: PubMed Central journal article supplement (PMC4053254; doi:10.1186/bcr3633), 2014-03-28

# Supplementary Figure 2S

2S a

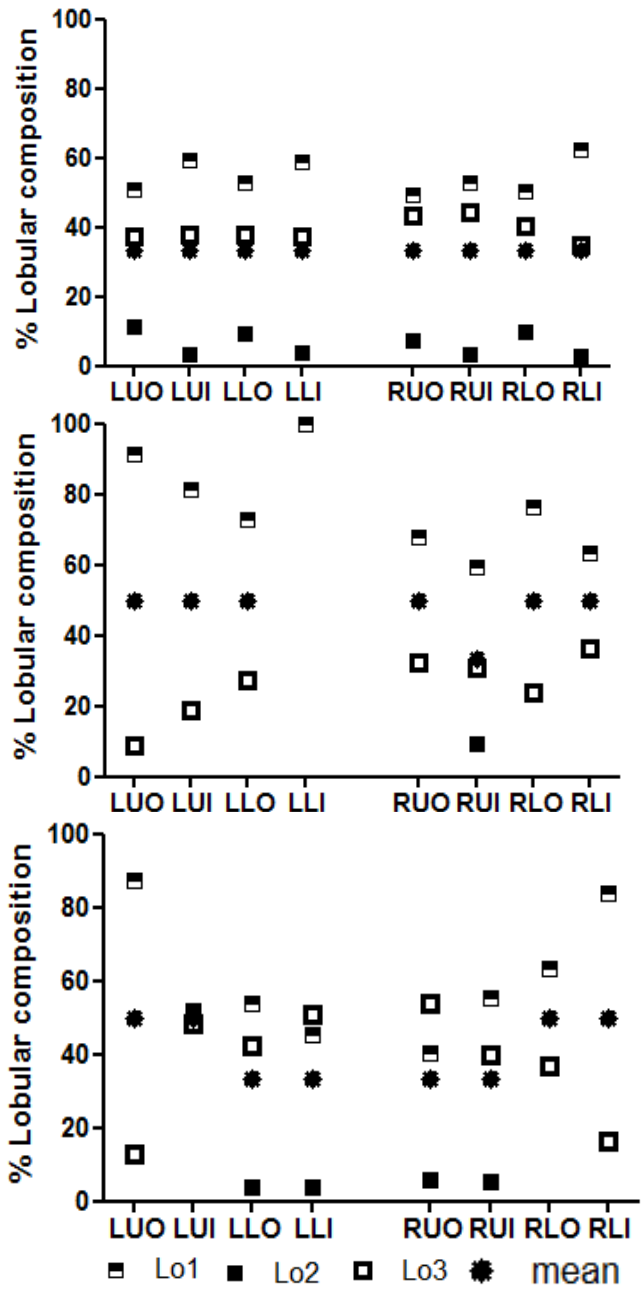

2S b

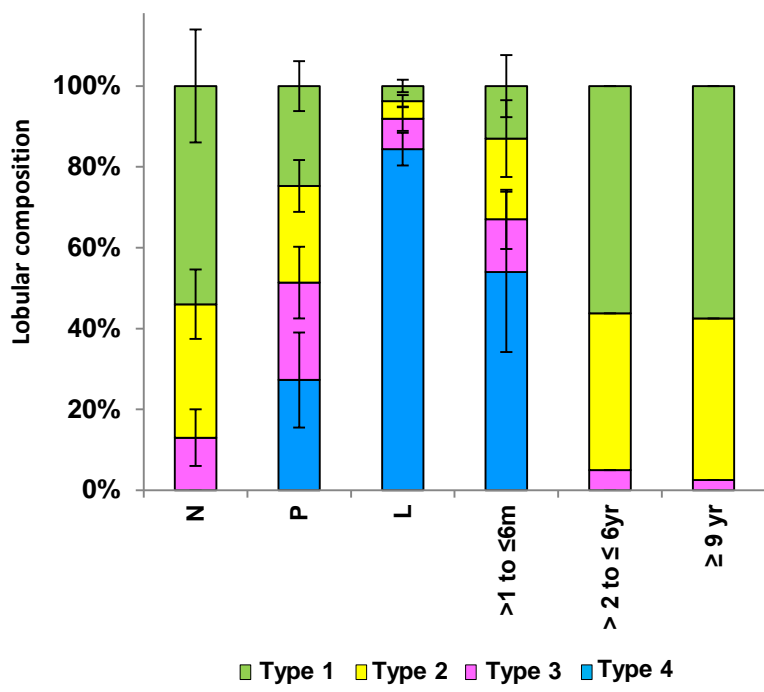

Supplement: bcr3633-S4.pdf [file bcr3633-S4.pdf]
